# Supplementary material for: Impact of point-of-care tests in community pharmacies: a systematic review and meta-analysis
Source: PubMed Central journal article supplement (PMC7232628; doi:10.1136/bmjopen-2019-034298), 2020-05-15
Supplement: bmjopen-2019-034298supp001.pdf [file bmjopen-2019-034298supp001.pdf]

Supplementary Figure 1 - Risk of bias for pre-post observational studies

|                  | study population defined | participation rate >50% | recruitment from same population | sample size justification | exposures measured prior to outcomes | reasonable timeframe between exposure and outcome | different levels of exposure examined | exposure measures clearly defined | exposure assessed more than once | outcome measure clearly defined | loss to follow up > 20% | confounding variables measured |
|------------------|--------------------------|-------------------------|----------------------------------|---------------------------|--------------------------------------|---------------------------------------------------|---------------------------------------|-----------------------------------|----------------------------------|---------------------------------|-------------------------|--------------------------------|
| Al Hamarneh 2013 | +                        | +                       | +                                | +                         | +                                    | +                                                 | +                                     | +                                 | +                                | +                               | +                       | ?                              |
| Bluml 2000       | +                        | +                       | +                                | +                         | +                                    | +                                                 | ?                                     | +                                 | +                                | +                               | +                       | +                              |
| Gerrald 2010     | +                        | +                       | +                                | +                         | +                                    | +                                                 | ?                                     | +                                 | ?                                | +                               | +                       | +                              |
| Harrison 2015    | +                        | +                       | +                                | +                         | +                                    | +                                                 | ?                                     | +                                 | +                                | +                               | +                       | +                              |
| Oyetayo 2011     | +                        | ?                       | ?                                | +                         | +                                    | +                                                 | ?                                     | ?                                 | +                                | +                               | ?                       | +                              |
| Rossiter 2013    | +                        | +                       | +                                | +                         | +                                    | +                                                 | ?                                     | +                                 | +                                | +                               | +                       | +                              |
| Wilson 2004      | +                        | +                       | +                                | +                         | +                                    | +                                                 | ?                                     | ?                                 | +                                | +                               | +                       | +                              |
