# Supplementary material for: Impact of point-of-care tests in community pharmacies: a systematic review and meta-analysis
Source: PubMed Central journal article supplement (PMC7232628; doi:10.1136/bmjopen-2019-034298), 2020-05-15

Supplementary Figure 2 - Risk of bias for retrospective case-control study

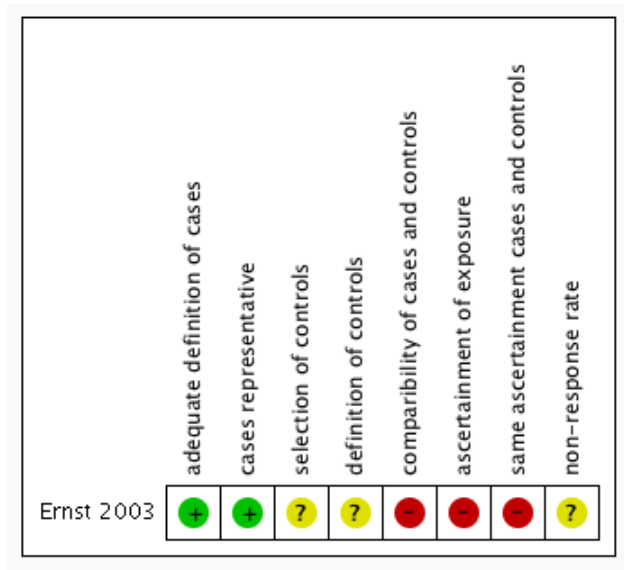

Supplement: bmjopen-2019-034298supp002.pdf [file bmjopen-2019-034298supp002.pdf]
