# Supplementary material for: Impact of point-of-care tests in community pharmacies: a systematic review and meta-analysis
Source: PubMed Central journal article supplement (PMC7232628; doi:10.1136/bmjopen-2019-034298), 2020-05-15
Supplement: bmjopen-2019-034298supp003.pdf [file bmjopen-2019-034298supp003.pdf]

Supplementary Figure 3 - Risk of bias for prospective controlled trials

|                   | Random sequence generation (selection bias) | Allocation concealment (selection bias) | Blinding of participants and personnel (performance bias) | Blinding of outcome assessment (detection bias) | Incomplete outcome data (attrition bias) | Selective reporting (reporting bias) | Other bias |
|-------------------|---------------------------------------------|-----------------------------------------|-----------------------------------------------------------|-------------------------------------------------|------------------------------------------|--------------------------------------|------------|
| Ansah 2015        | +                                           | -                                       | -                                                         | +                                               | +                                        | +                                    | +          |
| Deepalakshmi 2018 | -                                           | -                                       | -                                                         | -                                               | +                                        | ?                                    | +          |
| Ikwuobe 2013      | +                                           | -                                       | -                                                         | -                                               | ?                                        | ?                                    | +          |
| Mbonye 2015       | +                                           | -                                       | -                                                         | +                                               | +                                        | +                                    | +          |
| Peterson 2004     | +                                           | -                                       | -                                                         | -                                               | ?                                        | ?                                    | +          |
