# Supplementary material for: Impact of point-of-care tests in community pharmacies: a systematic review and meta-analysis
Source: PubMed Central journal article supplement (PMC7232628; doi:10.1136/bmjopen-2019-034298), 2020-05-15
Supplement: bmjopen-2019-034298supp004.pdf [file bmjopen-2019-034298supp004.pdf]

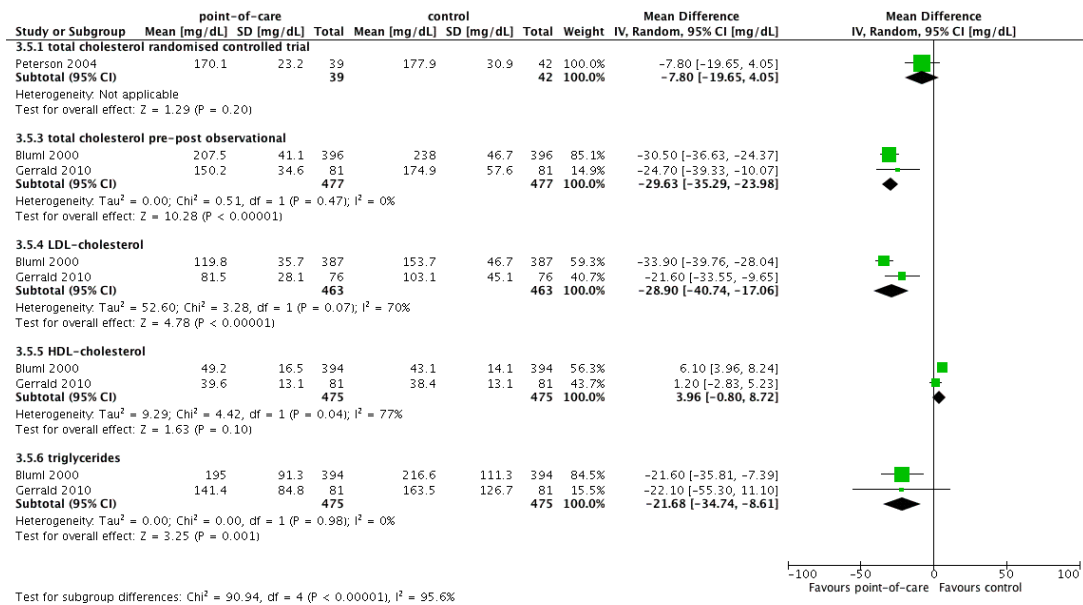

Supplementary Figure 4 – The effect of pharmacy point-of-care-testing on lipid control - Total cholesterol, LDL cholesterol, HDL cholesterol, and Triglycerides (mg/dL)
