# Supplementary material for: Impact of point-of-care tests in community pharmacies: a systematic review and meta-analysis
Source: PubMed Central journal article supplement (PMC7232628; doi:10.1136/bmjopen-2019-034298), 2020-05-15
Supplement: bmjopen-2019-034298supp005.pdf [file bmjopen-2019-034298supp005.pdf]

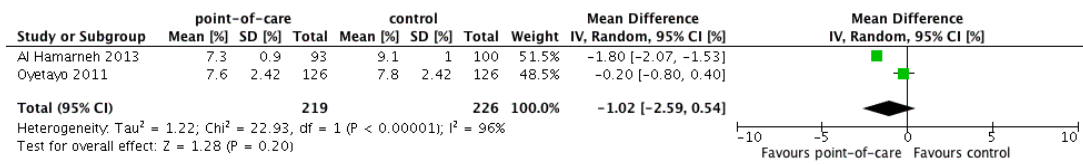

Supplementary Figure 5 – The effect of pharmacy point-of-care-testing on glycated haemoglobin HbA1c control (%)
