# Supplementary material for: Impact of point-of-care tests in community pharmacies: a systematic review and meta-analysis
Source: PubMed Central journal article supplement (PMC7232628; doi:10.1136/bmjopen-2019-034298), 2020-05-15
Supplement: bmjopen-2019-034298supp006.pdf [file bmjopen-2019-034298supp006.pdf]

| # ▲ | Searches                                                                                                                                                                                |
|-----|-----------------------------------------------------------------------------------------------------------------------------------------------------------------------------------------|
| 1   | ((rapid\$ or same time or same visit or near patient or portable or handheld or hand-held) adj3 (test\$ or analys\$ or analyz\$ or measure\$ or assay\$ or monitor* or device*)).ti,ab. |
| 2   | (fingerprick or finger prick).tw.                                                                                                                                                       |
| 3   | (poc or poct or "point of care").tw.                                                                                                                                                    |
| 4   | point-of-care systems/ or point-of-care testing/                                                                                                                                        |
| 5   | 1 or 2 or 3 or 4                                                                                                                                                                        |
| 6   | Community Pharmacy Services/                                                                                                                                                            |
| 7   | Pharmacists/                                                                                                                                                                            |
| 8   | (pharmacy or pharmacies or pharmacist?).ti,ab.                                                                                                                                          |
| 9   | 6 or 7 or 8                                                                                                                                                                             |
| 10  | 5 and 9                                                                                                                                                                                 |
| 11  | randomized controlled trial.pt.                                                                                                                                                         |
| 12  | controlled clinical trial.pt.                                                                                                                                                           |
| 13  | randomized.ab.                                                                                                                                                                          |
| 14  | placebo.ab.                                                                                                                                                                             |
| 15  | drug therapy.fs.                                                                                                                                                                        |
| 16  | randomly.ab.                                                                                                                                                                            |
| 17  | trial.ab.                                                                                                                                                                               |
| 18  | groups.ab.                                                                                                                                                                              |
| 19  | 11 or 12 or 13 or 14 or 15 or 16 or 17 or 18                                                                                                                                            |
| 20  | (animals not (humans and animals)).sh.                                                                                                                                                  |
| 21  | 19 not 20                                                                                                                                                                               |
| 22  | 10 and 21                                                                                                                                                                               |
| 23  | 10 not 22                                                                                                                                                                               |

Supplementary Table 1: Medline search strategy
